# Supplementary material for: Mechanistic insight into highly efficient gas permeation and separation in a shape-persistent ladder polymer membrane
Source: Royal Society of Chemistry journal article supplement (doi:10.1039/c3cp55498h), 2014-01-01
Supplement: c3cp55498h1.pdf [file c3cp55498h1.pdf]

## Electronic Supplementary Information

### Mechanistic insight into highly efficient gas permeation and separation in a shape-persistent ladder polymer membrane

Jianhai Zhou, Xiang Zhu, Jun Hu, Honglai Liu,\* Ying Hu

*State Key Laboratory of Chemical Engineering and Department of Chemistry, East China University of Science and Technology, Shanghai, 200237, China*

Jianwen Jiang\*

*Department of Chemical and Biomolecular Engineering, National University of Singapore, 117576, Singapore*

**Table S1.** A 21-step MD compression and relaxation scheme.<sup>1,2</sup>

| Step   | Slow Decompression Conditions                | Duration (ps) |
|--------|----------------------------------------------|---------------|
| 1      | NVT, $T_{\max}$                              | 50            |
| 2      | NVT, $T_{\text{final}}$                      | 100           |
| 3      | NPT, $0.02P_{\max}$ , $T_{\text{final}}$     | 50            |
| 4, 5   | NVT, $T_{\max}$ ; NVT, $T_{\text{final}}$    | 50, 100       |
| 6      | NPT, $0.6P_{\max}$ , $T_{\text{final}}$      | 50            |
| 7, 8   | NVT, $T_{\max}$ ; NVT, $T_{\text{final}}$    | 50, 100       |
| 9      | NPT, $P_{\max}$ , $T_{\text{final}}$         | 50            |
| 10, 11 | NVT, $T_{\max}$ ; NVT, $T_{\text{final}}$    | 50, 100       |
| 12     | NPT, $0.5P_{\max}$ , $T_{\text{final}}$      | 5             |
| 13, 14 | NVT, $T_{\max}$ ; NVT, $T_{\text{final}}$    | 5, 10         |
| 15     | NPT, $0.1P_{\max}$ , $T_{\text{final}}$      | 5             |
| 16, 17 | NVT, $T_{\max}$ ; NVT, $T_{\text{final}}$    | 5, 10         |
| 18     | NPT, $0.01P_{\max}$ , $T_{\text{final}}$     | 5             |
| 19, 20 | NVT, $T_{\max}$ ; NVT, $T_{\text{final}}$    | 5, 10         |
| 21     | NPT, $P_{\text{final}}$ , $T_{\text{final}}$ | 800           |

**Table S2.** Atomic charges and bond lengths of CO<sub>2</sub>, CH<sub>4</sub>, N<sub>2</sub>, O<sub>2</sub> and H<sub>2</sub>.

| Molecule                     | Atom | Charge ( $e$ ) | Bond length (Å) |
|------------------------------|------|----------------|-----------------|
| CO <sub>2</sub> <sup>3</sup> | C    | 0.576          | 1.180           |
|                              | O    | -0.288         |                 |
| CH <sub>4</sub> <sup>4</sup> | C    | -0.660         | 1.090           |
|                              | H    | 0.165          |                 |
| N <sub>2</sub> <sup>5</sup>  | N    | 0              | 1.102           |
| O <sub>2</sub> <sup>6</sup>  | O    | 0              | 1.208           |
| H <sub>2</sub> <sup>7</sup>  | H    | 0              | 0.740           |

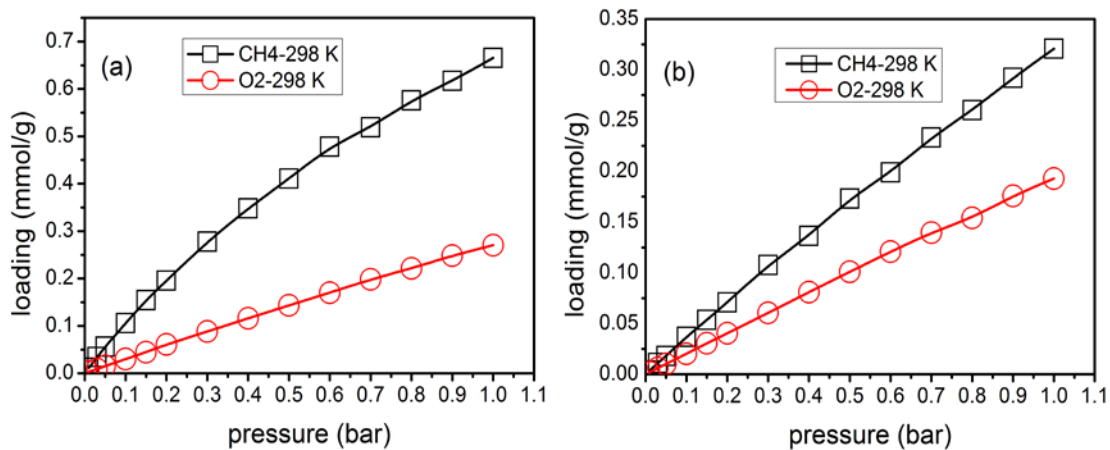

**Fig. S1** Simulated sorption isotherms of CH<sub>4</sub> and O<sub>2</sub> in (a) PIM-EA-TB and (b) PIM-SBI-TB.

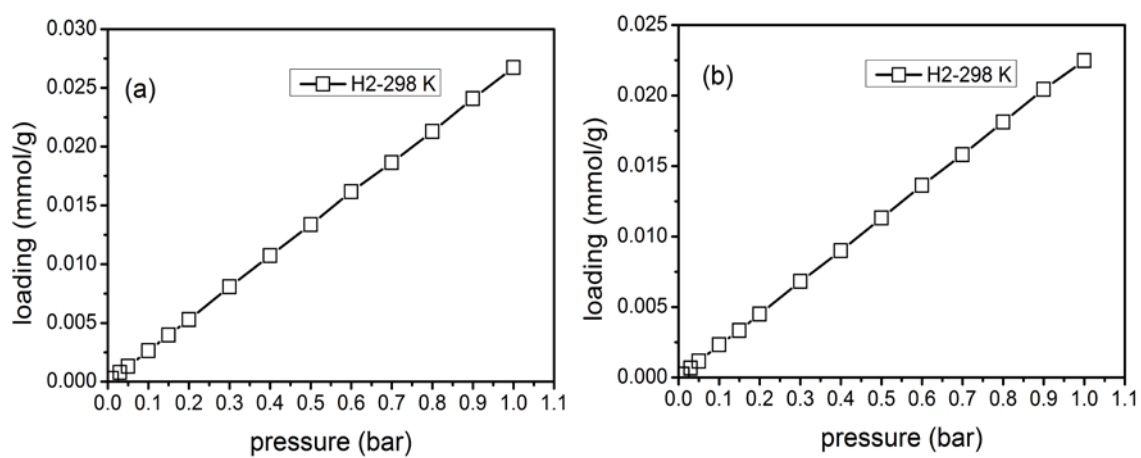

**Fig. S2** Simulated sorption isotherms of H<sub>2</sub> in (a) PIM-EA-TB and (b) PIM-SBI-TB.

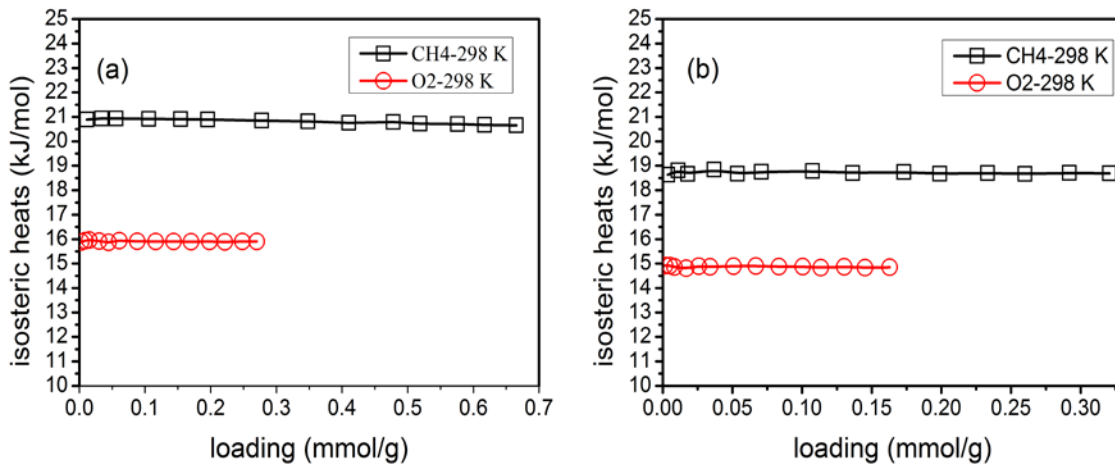

**Fig. S3** Simulated isosteric heats of CH<sub>4</sub> and O<sub>2</sub> sorption in (a) PIM-EA-TB and (b) PIM-SBI-TB.

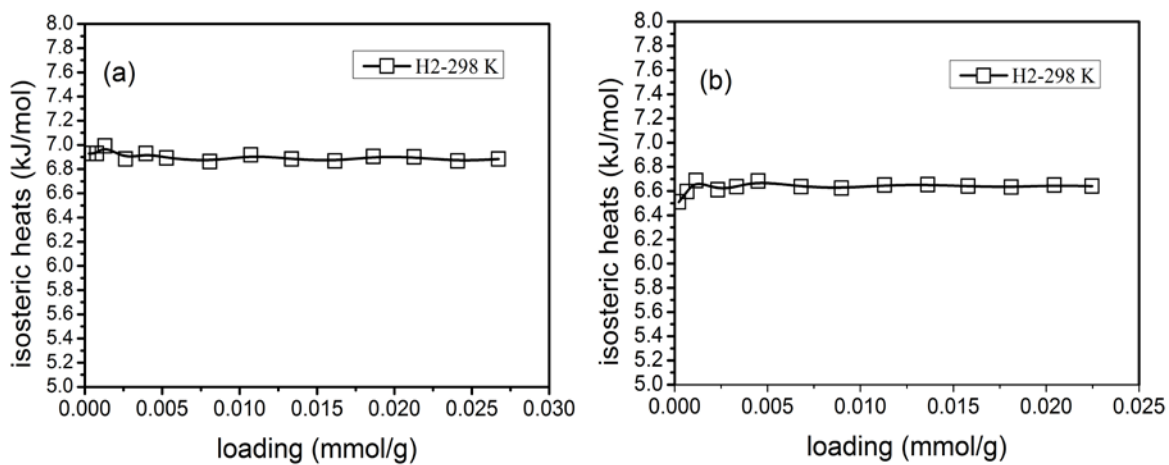

**Fig. S4** Simulated isosteric heats of H<sub>2</sub> sorption in (a) PIM-EA-TB and (b) PIM-SBI-TB.

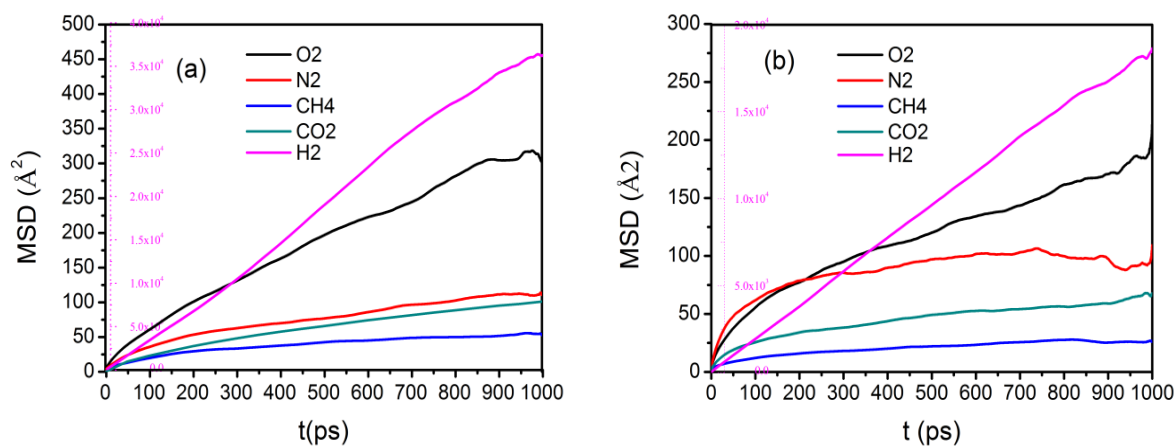

**Fig. S5** MSDs of O<sub>2</sub>, N<sub>2</sub>, CH<sub>4</sub>, CO<sub>2</sub> and H<sub>2</sub> in (a) PIM-EA-TB and (b) PIM-SBI-TB.

## References

- 1 G. S. Larsen, P. Lin, K. E. Hart and C. M. Colina, *Macromolecules*, 2011, **44**, 6944.
- 2 K. E. Hart, L. J. Abbott, N. B. McKeown and C. M. Colina, *Macromolecules*, 2013, **46**, 5371.
- 3 L. L. Zhang, Z. Q. Hu and J. W. Jiang, *J. Phys. Chem. C*, 2012, **116**, 19268.
- 4 S. Rives, H. Jobic, A. Beale and G. Maurin, *J. Phys. Chem. C*, 2013, **117**, 13530.
- 5 S. C. Zhuo, Y. M. Huang, J. Hu, H. L. Liu, Y. Hu and J. W. Jiang, *J. Phys. Chem. C*, 2008, **112**, 11295.
- 6 J. W. Jiang and S. I. Sandler, *Langmuir*, 2004, **20**, 10910.
- 7 R. F. Cracknell, *Mol. Phys.*, 2002, **100**, 2079.
